# Supplementary material
Source: MDPI journal article supplement (https://www.mdpi.com/2073-4344/11/4/424)
Supplement: s1 [file s1]

# Supplementary Materials: Environmentally Friendly Route for Fabricating Conductive Agent for Lithium-Ion Batteries: Carbon Nanoparticles Derived from Polyethylene

Jihye Mok <sup>1</sup>, Dalsu Choi <sup>1,\*</sup> and Suk Ho Bhang <sup>2,\*</sup>

<sup>1</sup> Department of Chemical Engineering, Myongji University, Yong-In 17058, Korea; wlgphtjr@mju.ac.kr

<sup>2</sup> School of Chemical Engineering, Sungkyunkwan University, Suwon 16419, Korea

\* Correspondence: dalsuchoi@mju.ac.kr (D.C.); sukhobhang@skku.edu (S.H.B.)

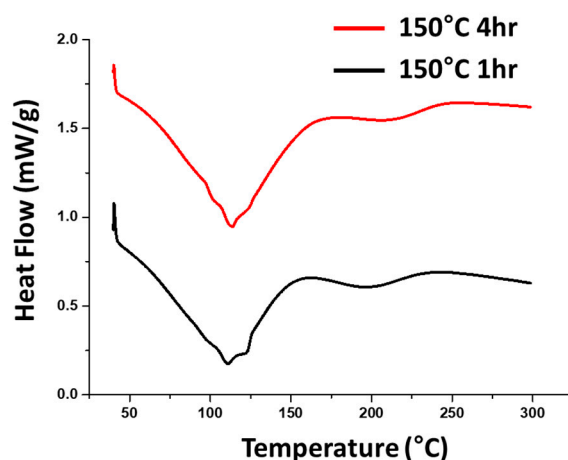

Figure S1. DSC measurements of PE sample with varied sulfonation time.

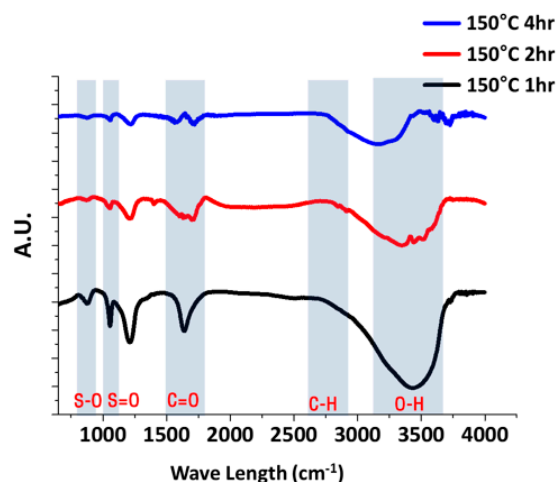

Figure S2. FT-IR results of PE samples with varied sulfonation time.

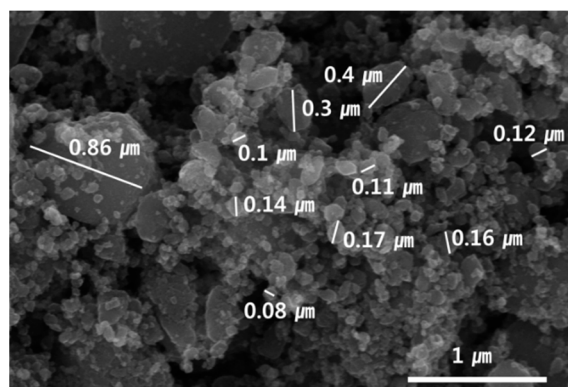

Figure S3. Representative scanning electron microscopy (SEM) image of ball-milled PE carbon.

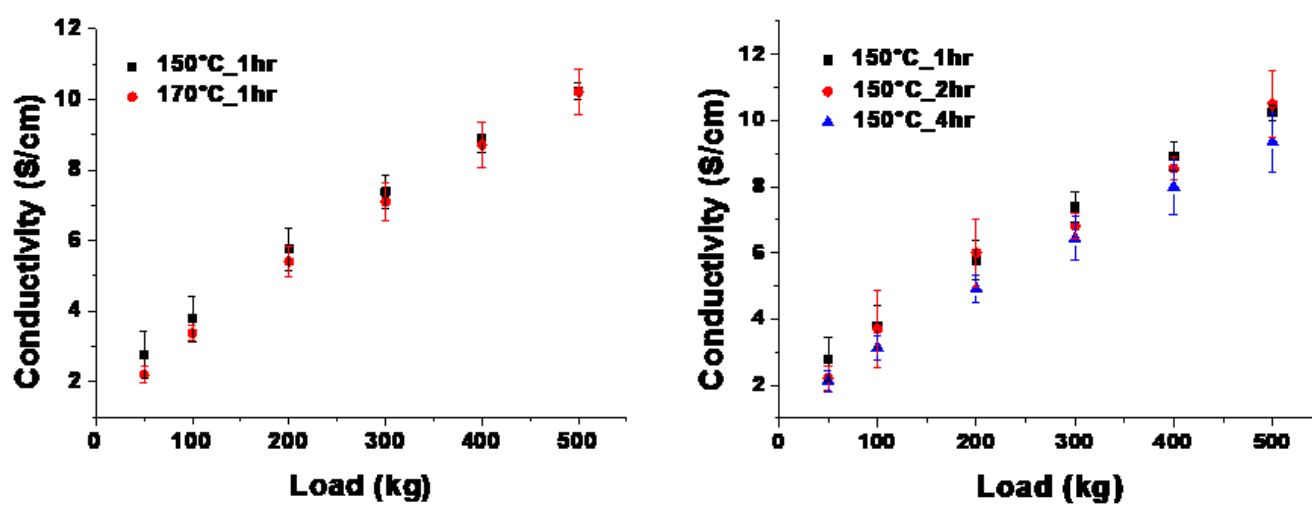

Figure S4. Powder electrical conductivity measurement of PE samples sulfonated for varied temperature (Left) and time (Right).

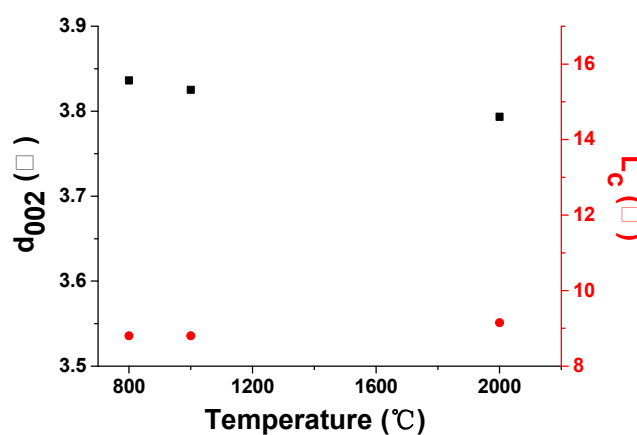

Figure S5. XRD analysis result of sulfonated PE samples carbonized at various temperatures.
